# Supplementary material for: Improved filtration performance and antifouling properties of polyethersulfone ultrafiltration membranes by blending with carboxylic acid functionalized polysulfone
Source: RSC Adv. 2018 Feb 19;8(14):7774–84. doi: 10.1039/c7ra12447c (PMC9078463; doi:10.1039/c7ra12447c)
Supplement: RA-008-C7RA12447C-s001 [file RA-008-C7RA12447C-s001.pdf]

## Supplementary Information

### Improved filtration performance and antifouling property of polyethersulfone ultrafiltration membranes by blending with carboxylic acid functionalized polysulfone

Xing Wu<sup>a,b,c</sup>, Zongli Xie<sup>\*c</sup>, Huanting Wang<sup>d</sup>, Chen Zhao<sup>d</sup>, Derrick Ng<sup>e</sup>, Kaisong Zhang<sup>\*a,b</sup>

1. Key Laboratory of Urban Pollutant Conversion, Institute of Urban Environment, Chinese Academy of Sciences, Xiamen, 361021, China. Email: [kszhang@iue.ac.cn](mailto:kszhang@iue.ac.cn);
2. University of Chinese Academy of Sciences, Beijing, 100049, China
3. CSIRO Manufacturing, Private bag 10, Clayton South, Victoria 3169, Australia. Email: [zongli.xie@csiro.au](mailto:zongli.xie@csiro.au)
4. Department of Chemical Engineering, Monash University, Clayton, Victoria 3800, Australia

## Figure Captions

**Table S1.** The composition of PSF and PES/PSF-4 casting solutions.

**Fig. S1.** Differential scanning calorimetric (DSC) curves of PSF and PES/PSF-4 membranes under N<sub>2</sub> atmosphere.

**Fig. S2.** FTIR spectra of the PSF membrane and PES/PSF-4 membrane.

**Table S2.** Pure water flux, BSA rejection and contact angle of the PES/PSF-4 membrane.

**Table S1.** The composition of PSF and PES/PSF-4 casting solutions.

| Membrane  | PVP (wt.%) | PES (wt.%) | DMF (wt.%) | PSF (wt.%) |
|-----------|------------|------------|------------|------------|
| PSF       | 1.5        | 0.0        | 81.0       | 17.5       |
| PES/PSF-4 | 1.5        | 13.5       | 81.0       | 4.0        |

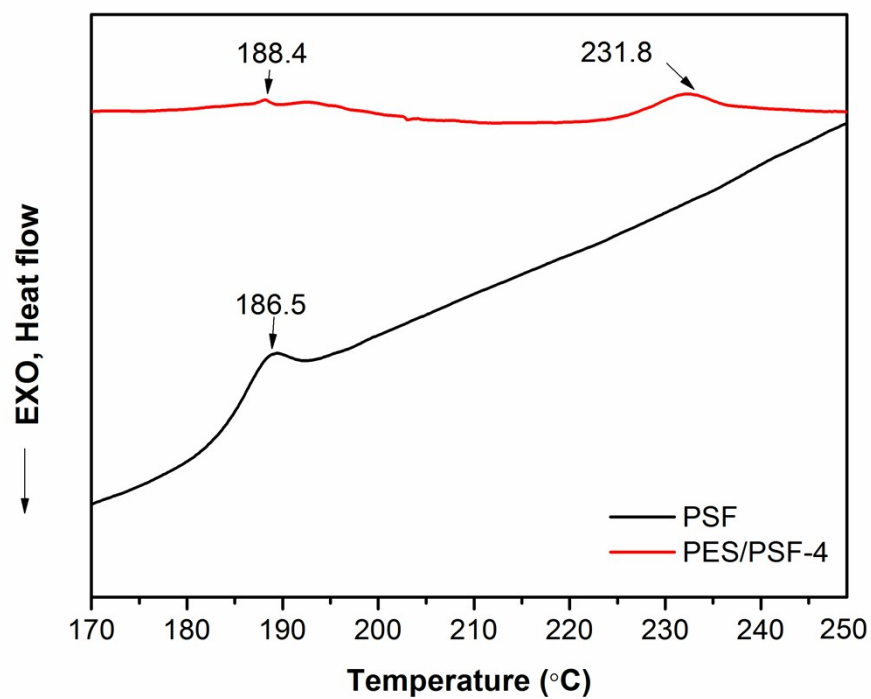

**Fig. S1.** Differential scanning calorimetric (DSC) curves of PSF and PES/PSF-4 membranes under N<sub>2</sub> atmosphere.

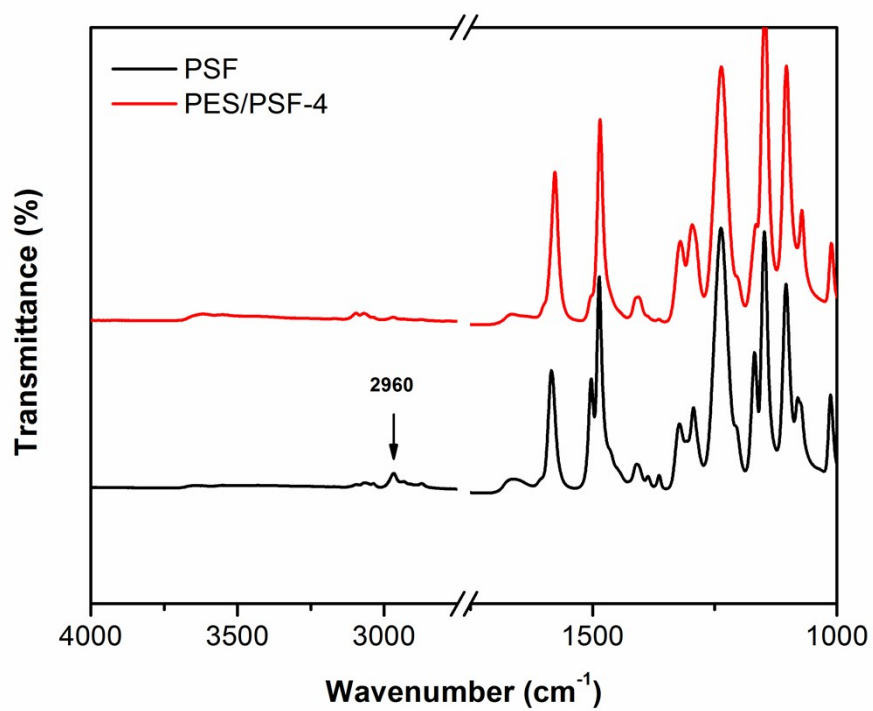

**Fig. S2.** FTIR spectra of the PSF membrane and PES/PSF-4 membrane.

**Table S2.** Pure water flux, BSA rejection and contact angle of the PES/PSF-4 membrane.

| Membrane  | Pure water flux ( $\text{L}\cdot\text{m}^{-2}\cdot\text{h}^{-1}$ ) <sup>a</sup> | BSA rejection (%) <sup>b</sup> | Contact angles  |
|-----------|---------------------------------------------------------------------------------|--------------------------------|-----------------|
| PES/PSF-4 | $816.9 \pm 25.0$                                                                | $43.8 \pm 1.8$                 | $84.5 \pm 0.92$ |

<sup>a</sup> Pure water flux was measured in a dead-end ultrafiltration testing system at 0.1 MPa and DI water was used as the feed solution.

<sup>b</sup> BSA rejection was measured in a dead-end ultrafiltration testing system at 0.1 MPa and  $1\text{g}\cdot\text{L}^{-1}$  BSA was used as the feed solution.
